# Supplementary material
Source: PubMed Central journal article supplement (PMC3367530)
Supplement: cr201218x1.pdf [file cr201218x1.pdf]

**Supplementary information, Table S1** RT-PCR Primers for Detecting MLH1 and  $\beta$ -actin mRNA, pre-miR-422a, and pri-miR-422a (related to Figures 1-3)

| Primer                           | oligo sequence                                | PCR size |   |
|----------------------------------|-----------------------------------------------|----------|---|
| <b><math>\beta</math>-actin:</b> |                                               |          |   |
| $\beta$ -actin F                 | 5'-cttccttctctggcatggag-3'                    | 315bp    | * |
| $\beta$ -actin R                 | 5'-tggagggggccggactcgtca-3'                   |          |   |
| <b>MLH1:</b>                     |                                               |          |   |
| MLH1-551-F                       | 5' cagtacacaatgcaggca 3' (in <b>Exon 7</b> )  | 117bp    |   |
| MLH1-667-R                       | 5' cattccaagatggagcga..3' (in <b>Exon 8</b> ) |          |   |
| <b>pri-miR-422a:</b>             |                                               |          |   |
| pri-miR422a-F                    | 5' gatgcatac ctcattggtg agc 3'                | 198bp    |   |
| pri-miR422a-R                    | 5'-tggaggccatgcctaaatgaac-3'                  |          |   |
| <b>pre-miR-422a:</b>             |                                               |          |   |
| pre-miR422a-F                    | 5' agaagcactggacttagggtc 3'                   | 83bp     |   |
| pre-miR422a-R                    | 5' ggaggacaaagcttggtca 3'                     |          |   |

\* These primers were previously described in Wang *et al.* <sup>1</sup>.

## REFERENCES

1. Wang J, Pitarque M, Ingelman-Sundberg M. 3'-UTR polymorphism in the human CYP2A6 gene affects mRNA stability and enzyme expression. *Biochem Biophys Res Commun* 2006; **340** (2):491-497.
