# Supplementary material
Source: PubMed Central journal article supplement (PMC3367530)
Supplement: cr201218x3.pdf [file cr201218x3.pdf]

**Supplementary information, Table S3** Primers for Cloning Drosha and DGCR8 (related to Figures 4-7).

|                                              |                                                                                                     |  |
|----------------------------------------------|-----------------------------------------------------------------------------------------------------|--|
| <b>pFB-HF-DGCR8:</b>                         |                                                                                                     |  |
|                                              | <b>DiG8EcRIFlg-F:</b><br>5'gcgcGAATTCCACCATGGATTACAAGGATGACGACGATAAGATCatggagacagatgagagccctctcc 3' |  |
|                                              | <b>DiG8Hnd3-R:</b> 5'taatAAGCTTcacacgtccacggtgcacaggggc 3'                                          |  |
| <b>pMAL-DGCR8-F/H:</b>                       |                                                                                                     |  |
|                                              | <b>DGCR8EcRI-F:</b> 5'tgcaGAATTCaccatggagacagatgagagccctctcc 3'                                     |  |
|                                              | <b>DGCR8FlgHd3-R2:</b> 5'gctcAAGCTTcacccttatcgtcgtcatccttgaatccacgtccacggtgcacaggggc 3'             |  |
| <b>pMAL-Drosha-F/H:</b>                      |                                                                                                     |  |
|                                              | <b>DrshBmHI-F2:</b> 5'gacGGATCCACCatgagcagggaacacatgtcacagaatgc 3'                                  |  |
|                                              | <b>DrshFlgHnd3-R2:</b> 5'gcgcAAGCTT gatcttatcgtcgtcatccttgaatcttctgatgtcttcagtctcatctggc 3'         |  |
| <b>pFB-MBP-Drosha-FH / pFB-MBP-DGCR8-FH:</b> |                                                                                                     |  |
|                                              | <b>malEXbaI-F:</b> 5'-gcgcTCTAGAatgaaaatcgaagaaggtaaactgtaatctgg-3'                                 |  |
|                                              | <b>FlgHisHnd3-R3:</b><br>5'gctcAAGCTTcagtgatggtgatggtgatgcgagcccgatcccttcatcgtcgtcatccttgaatc3'     |  |
|                                              |                                                                                                     |  |

The underlined nucleotides indicate restriction enzymes used for cloning.
